# Supplementary material for: Review of alternatives to root cause analysis: developing a robust system for incident report analysis
Source: PubMed Central journal article supplement — BMJ Open Qual. 2019 Aug 1;8(3):e000646. doi: 10.1136/bmjoq-2019-000646 (PMC6683108; doi:10.1136/bmjoq-2019-000646), 2019-08-01

## Appendix 1. Search Strings and References Screening Diagram

In PubMed:

("Root Cause Analysis"[Mesh] OR "root cause"[ti] OR "medical error\*"[ti] OR "clinical error\*"[ti] OR "patient safety"[ti] OR "incident report\*"[ti] OR "adverse event\*"[ti] OR "clinical incident\*"[ti] OR "critical incident\*"[ti] OR "adverse medical event\*"[ti] OR "after action review"[ti] OR debrief\*"[ti] OR huddle\*"[ti] OR "learn from defect"[ti] OR "concise incident"[ti] OR "concise investigation"[ti] OR "Canadian Incident Analysis Framework"[ti] OR "multi-incident analysis"[ti] OR "aggregate RCA"[ti]) AND (alternative\*"[ti] OR tool\*"[ti])

In Embase:

"root cause analysis"/ OR ("root cause" or "medical error\*" or "clinical error\*" or "patient safety" or "incident report\*" or "adverse event\*" or "clinical incident\*" or "critical incident\*" or "adverse medical event\*" or "after action review" or debrief\* or huddle\* or "learn from defect" or "concise incident" or "concise investigation" or "Canadian Incident Analysis Framework" or "multi-incident analysis" or "aggregate RCA").ti. AND (alternative or tool).ti.

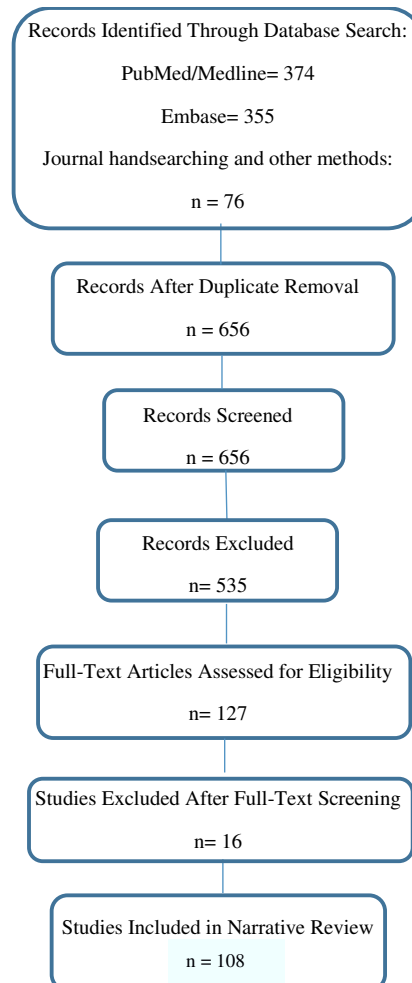

Supplement: bmjoq-2019-000646supp001.pdf [file bmjoq-2019-000646supp001.pdf]
